# Supplementary material for: Generation of Matrix Degradation Products Using an In Vitro MMP Cleavage Assay
Source: MDPI journal article supplement (doi:10.3390/ijms23116245), 2022-06-02
Supplement: s1 [file s1]

**Supplemental Figures:**

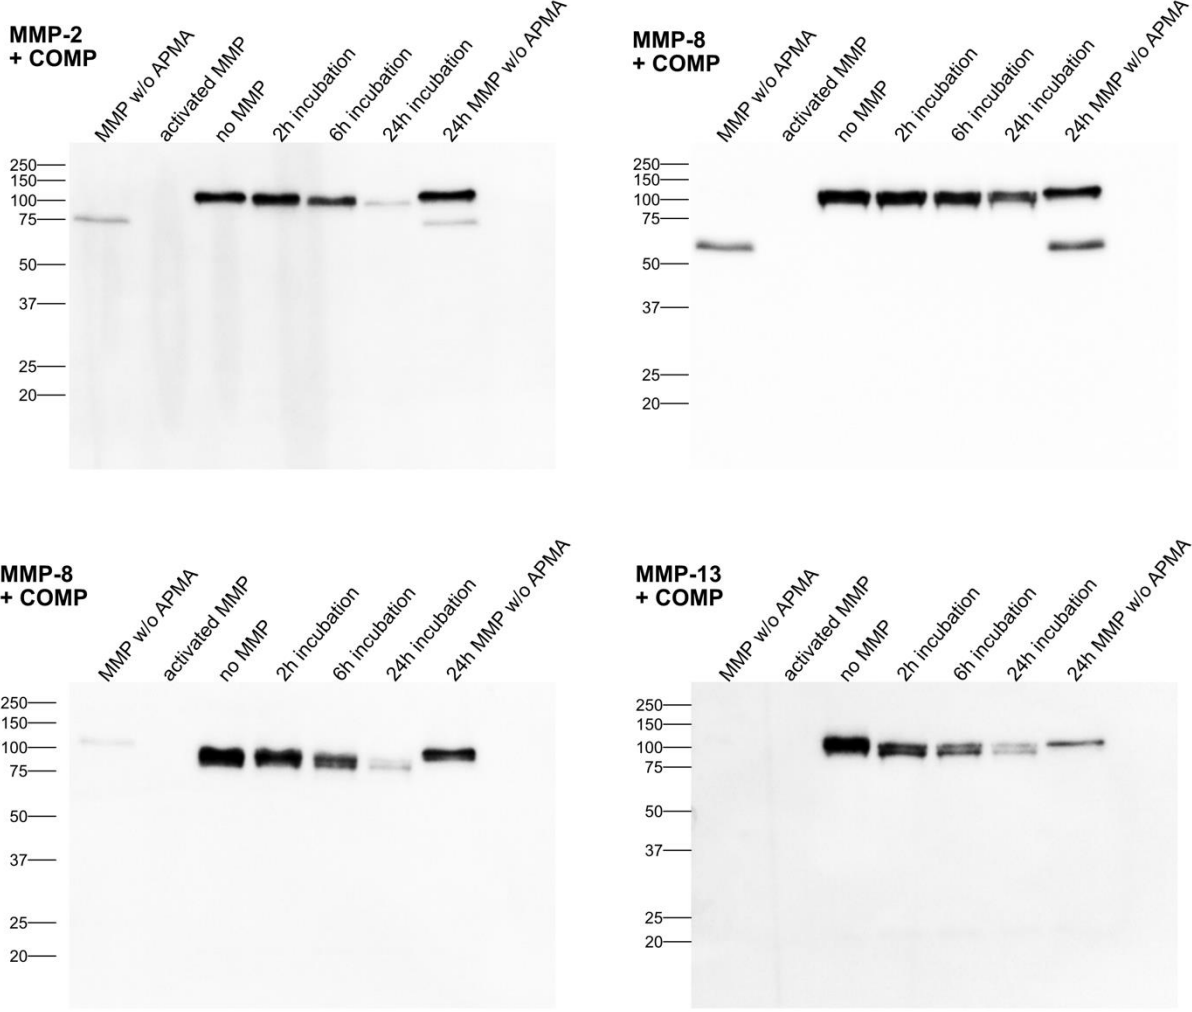

Figure S1: MMPs have to be activated by APMA for efficient proteolytic cleavage of COMP. COMP was incubated with activated or non-activated MMP for different time points. Efficient cleavage is indicated by a reduction of signal intensity and, in some cases, a shift towards a smaller size compared to the full-length protein without MMP (no MMP). Cleavage was observed with activated MMPs only.

| Sequence ID | Start | Alignment | End | Organism     |
|-------------|-------|-----------|-----|--------------|
| EAW95841.1  | (+)   | 1         | 961 | Homo sapiens |
| AAI25093.1  | (+)   | 1         | 757 | Homo sapiens |

|                                     |                            |     |                                                                                   |     |
|-------------------------------------|----------------------------|-----|-----------------------------------------------------------------------------------|-----|
| <input checked="" type="checkbox"/> | <a href="#">EAW95841.1</a> | 1   | MLAPRGAAVLLHLVLRWLAAGAATPQVFDLLPSSSQLNPGALLPVLTDPALNDLYVISTFKLQTKSSATIFGLYSS      | 80  |
| <input checked="" type="checkbox"/> | <a href="#">AAI25093.1</a> |     | -----                                                                             |     |
| <input checked="" type="checkbox"/> | <a href="#">EAW95841.1</a> | 81  | TDNSKYFEFTVMGRLNKAILRVLKNDGKVLVVFNNLQLADGRRRIRILLRSLNLRGAGSLELYLDCIQVDSVHNLPRAF   | 160 |
| <input checked="" type="checkbox"/> | <a href="#">AAI25093.1</a> |     | -----                                                                             |     |
| <input checked="" type="checkbox"/> | <a href="#">EAW95841.1</a> | 161 | AGPSQKPEITELRTFQRKQDFLEELKLVVRGSLFQVASLQDCFLQQSEPLAATGTG-----DFNRQFLGQMTQLNQLL    | 234 |
| <input checked="" type="checkbox"/> | <a href="#">AAI25093.1</a> | 1   | -----MVPDTACVLLLLAALGASGQGQSPPLGSDLGPQMLRELQETNAAL                                | 45  |
| <input checked="" type="checkbox"/> | <a href="#">EAW95841.1</a> | 235 | GEVKDLLRQVQKETSFLRNTIAECQACGPKLQSPSTPSTVPPAPPTRPFRRCDSNCFRGVQCTDSRDGFQCGPCP       | 314 |
| <input checked="" type="checkbox"/> | <a href="#">AAI25093.1</a> | 46  | QDVRELLRQVREITFLKNTVMECDACG---MQQSVRTGL-----PSVRPLLHCAPGFQPGVACIQTESGARCGPCP      | 115 |
| <input checked="" type="checkbox"/> | <a href="#">EAW95841.1</a> | 315 | EGYTGNGITCIDVDECKYHPCYPGVHCINLSPGFRCDAFVGTGPMVQGVGISFAKSNKQVCTDIDECRNGA--CVPNS    | 392 |
| <input checked="" type="checkbox"/> | <a href="#">AAI25093.1</a> | 116 | AGFTGNGSHCTDVNECNAHPCFRVRCINTSPGFRCEACPPGYSGPTHQGVGLAFKANKQVCTDINECETQGHNCVPNS    | 195 |
| <input checked="" type="checkbox"/> | <a href="#">EAW95841.1</a> | 393 | ICVNTLGSYRCGCKPGYTGDIQRC--KAERNCRNPELNPCSVNAQCIEERQGDVTCVCGVWAGDGYICGKDVDDISY     | 470 |
| <input checked="" type="checkbox"/> | <a href="#">AAI25093.1</a> | 196 | VCINTRGSFQCGPCQPGFVGDQASGCQRRARFCPDGSPSECHEHADCVLERDGSRSVCVAVGWAGNGLCGRDTDLDF     | 275 |
| <input checked="" type="checkbox"/> | <a href="#">EAW95841.1</a> | 471 | PDEELPCSARNCKKDNCKYVPNSGQEDADRDIQDADCEADADGDGILNEQDNCVLIHNVDQRNSDKDIFGDACDNCLSVL  | 550 |
| <input checked="" type="checkbox"/> | <a href="#">AAI25093.1</a> | 276 | PDEKLRCPERQCRKDNCKVTPNSGQEDVDRDGIQDADDPADGDGVPNEKDNCPVLRNPQQRNTDEDKWDACDNCRSQK    | 355 |
| <input checked="" type="checkbox"/> | <a href="#">EAW95841.1</a> | 551 | NNDQKDTDQDGRGDACDDDDMDGDIKNILDNCFKFPNRDQRKDGDCVGDACDSCPDSVSNPQSDVDNDLVGDSCTNQD    | 630 |
| <input checked="" type="checkbox"/> | <a href="#">AAI25093.1</a> | 356 | NNDQKDTDQDGRGDACDDDDIDGDIRNQADNCPRVNSDQKDSDDGIGDADCNCPKSNPDQADVDHDFVGDACDSDQD     | 435 |
| <input checked="" type="checkbox"/> | <a href="#">EAW95841.1</a> | 631 | SDGDGHQDSTDNCPVTIINSAQLDITKDGIGDECDDDDDNDGIPDLVPPGPDNCRVLPNPAQEDSNSDGVGDICESDFDQD | 710 |
| <input checked="" type="checkbox"/> | <a href="#">AAI25093.1</a> | 436 | QDGDGHQDSDNCPVTVPNSAQEDSDHDGQGDACDDDDDDNDGVPD---SRDNCRLVPPGQEDADRQDGVGVCQDQDFDAD  | 511 |
| <input checked="" type="checkbox"/> | <a href="#">EAW95841.1</a> | 711 | QVIDRIDVCPENAEVTLTDFRAYQTVVLDPEGDAQIDPNWVVLNQGMEIVQTMNSDPGLAVGYTAFNGVDFEGTFHVNTQ  | 790 |
| <input checked="" type="checkbox"/> | <a href="#">AAI25093.1</a> | 512 | KVVDKIDVCPENAEVTLTDFRAYQTVVLDPEGDAQIDPNWVVLNQGREIVQTMNSDPGLAVGYTAFNGVDFEGTFHVNTV  | 591 |
| <input checked="" type="checkbox"/> | <a href="#">EAW95841.1</a> | 791 | TDDDYAGFIFGYQDSSSFYVVMWQTEQTYWQATPFRAVAEPIQLKAVKSKTGPGEHLRNSLWHTGDTESQVRLWWDKDS   | 870 |
| <input checked="" type="checkbox"/> | <a href="#">AAI25093.1</a> | 592 | TDDDYAGFIFGYQDSSSFYVVMWQMEQTYWQATPFRAVAEPIQLKAVKSKTGPGEQLRNALWHTGDTESQVRLWWDKDP   | 671 |
| <input checked="" type="checkbox"/> | <a href="#">EAW95841.1</a> | 871 | RNVGWKDKVSYRWFLQHRPQVGYIRVRFYEGSELVADSGVTIDTTMRGGRLGVFCFSQENI IWSNLKYRCNDTIPEDFQE | 950 |
| <input checked="" type="checkbox"/> | <a href="#">AAI25093.1</a> | 672 | RNVGWKDKVSYRWFLQHRPQVGYIRVRFYEGSELVADSNVLDTTMRGGRLGVFCFSQENI IWANLRYRCNDTIPEDYET  | 751 |
| <input checked="" type="checkbox"/> | <a href="#">EAW95841.1</a> | 951 | FQTQNFDRFDN 961                                                                   |     |
| <input checked="" type="checkbox"/> | <a href="#">AAI25093.1</a> | 752 | HQLRQA----- 757                                                                   |     |

EAW95841.1 = Thrombospondin-4  
 AAI25093.1 = COMP

Figure S2: Sequence alignment of COMP and TSP-4. Red amino acids are conserved, blue indicates differences in sequence.
